# Supplementary material for: New Robotic Platforms in General Surgery: What’s the Current Clinical Scenario?
Source: MDPI journal article supplement (doi:10.3390/medicina59071264), 2023-07-07
Supplement: s1 [file s1]

Table S6. Upper gastrointestinal and bariatric surgery

| References                         | Country | Study design                                                 | Time period                  | Surgical indication  | No. of pts/ | Type of intervention                                   | Robotic platform                | No. of operative               | Surgeons | Surgeon previous experience                                       | Surgical Team training                                                                   | Main results                                                                                                         |
|------------------------------------|---------|--------------------------------------------------------------|------------------------------|----------------------|-------------|--------------------------------------------------------|---------------------------------|--------------------------------|----------|-------------------------------------------------------------------|------------------------------------------------------------------------------------------|----------------------------------------------------------------------------------------------------------------------|
| <i>Case report/Technical notes</i> |         |                                                              |                              |                      |             |                                                        |                                 |                                |          |                                                                   |                                                                                          |                                                                                                                      |
| Dreifuss N.H. et al. (2022) [42]   | US      | Case report                                                  | 2022                         | Gastric GIST         | 1           | Partial gastrectomy                                    | Intuitive Surgical Da Vinci SP® | 3                              | NS       | NS                                                                | NS                                                                                       | OT: 82 min; no IO complications, no PO complications. hospital discharge: POD 2                                      |
| Sugita H. et al. (2020) [43]       | Japan   | Case report                                                  | 2020                         | Gastric GIST         | 1           | Partial gastrectomy                                    | Asensus Senhance®               | 2 (+1 AP)                      | NS       | NS                                                                | NS                                                                                       | OT: 117 min, DT: 11 min; CT: 59 min; no BL; no complications; hospital discharge: POD 8                              |
| Cui H. et al. (2022) [44]          | China   | Case report                                                  | 2022                         | Antral adenoca       | 1           | total gastrectomy with D2 lymphadenectomy              | Intuitive Surgical Da Vinci SP® | 3 (+1 AP)                      | 2        | NS                                                                | NS                                                                                       | OT: 245 min, DT: 10 min; BL: 225 ml; no complications; hospital discharge: POD 8                                     |
| Cubisino A. et al. (2022) [45]     | US      | Case series                                                  | 2022                         | GERD                 | 2           | 1 Nissen fundoplication; 1 redo Nissen flundoplication | Intuitive Surgical Da Vinci SP® | 3                              | 1        | 275 SP procedure, extensive experience in single site and robotic | NS                                                                                       | OT: 147 min, DT: 2.5 min; CT: 144.5 min; BL 10 ml; no IO complications; hospital discharge POD 2.5                   |
| <i>Non-comparative studies</i>     |         |                                                              |                              |                      |             |                                                        |                                 |                                |          |                                                                   |                                                                                          |                                                                                                                      |
| Puntambekar S. et al. (2022) [85]  | India   | Retrospective analysis of a prospectively collected database | 22 month (Aug 2019-Jun 2021) | Oesophagel neoplasia | 57          | transthoracic oesophagectomy                           | CMR Versius®                    | 2 (+1 AP)                      | 1        | Oncologic surgeon with extensive robotic experience (>800 cases)  | Team member: 3.5 day training program                                                    | OT: 230 min (47-330); BL: <500cc; Clavien-Dindo≥3 : 0; no reoperations; hospital discharge: POD 6                    |
| Schmitz R. et al. (2020) [86]      | Germany | Retrospective analysis of a prospectively collected database | 26 month (Mar 2017-Jul 2019) | GERD                 | 18          | Nissen fundoplication                                  | Asensus Senhance®               | 2 (+1 AP + 1 liver retractor ) | 4        | >400 procedures                                                   | Cadaver lab and supervision + training sessions. Inguinal hernia before the first Nissen | OT: 95,5 min (68-194); DT: 7 min (4-14); CT: 74 min (52-172); conversion to laparoscopy: 5.5%; Clavien-Dindo≥3: 5.5% |

|                            |       |             |                                             |                   |   |                       |                        |               |    |                             |    |                                                                                                   |
|----------------------------|-------|-------------|---------------------------------------------|-------------------|---|-----------------------|------------------------|---------------|----|-----------------------------|----|---------------------------------------------------------------------------------------------------|
| Li W. et al<br>(2021) [84] | China | Case series | 13<br>mont<br>(Mar<br>2018-<br>Apr<br>2019) | Morbid<br>obesity | 7 | Sleeve<br>gastrectomy | Wego<br>MicroHand S II | 2 (+ 1<br>AP) | NS | Sufficient<br>training (NS) | NS | OT: 160 min; BL: 21cc; no Clavien-Dindo≥3; hospital<br>discharge: POD 4; weigh loss at 3 mos: 63% |
|----------------------------|-------|-------------|---------------------------------------------|-------------------|---|-----------------------|------------------------|---------------|----|-----------------------------|----|---------------------------------------------------------------------------------------------------|

All the reported values are absolute or median if not specified. NS: not specified; IO: intraoperative; PO: postoperative; OT: operative time; CT: console time; DT: docking time; AP: assistant port; BL: blood loss; LOS: length of stay; Adenoca: adenocarcinoma; GIST: gastrointestinal stromal tumor; GERD: gastroesophageal reflux disease.
