# Supplementary material for: New Robotic Platforms in General Surgery: What’s the Current Clinical Scenario?
Source: MDPI journal article supplement (doi:10.3390/medicina59071264), 2023-07-07
Supplement: s1 [file s1]

Table S5. Endocrine surgery

| References                     | Country     | Study design           | Time period                   | Surgical indication                                                                                              | No. of pts/ procedures | Type of intervention                                      | Robotic platform                | No. of operative          | Surgeons | Surgeon previous experience                                                   | Surgical Team training                                                                                               | Main results                                                                                                                  |
|--------------------------------|-------------|------------------------|-------------------------------|------------------------------------------------------------------------------------------------------------------|------------------------|-----------------------------------------------------------|---------------------------------|---------------------------|----------|-------------------------------------------------------------------------------|----------------------------------------------------------------------------------------------------------------------|-------------------------------------------------------------------------------------------------------------------------------|
| <i>Non-comparative studies</i> |             |                        |                               |                                                                                                                  |                        |                                                           |                                 |                           |          |                                                                               |                                                                                                                      |                                                                                                                               |
| Kim K. et al. (2020) [82]      | South Korea | Case series            | 5 mos (Dec 2018 - Apr 2019)   | papillary thyroid carcinoma                                                                                      | 10                     | Transaxillary hemithyroidectomy                           | Intuitive Surgical Da Vinci SP® | 3 (+ 1 AP)                | 2        | NS                                                                            | NS                                                                                                                   | OT: 148 min, DT: 4.9 min; CT: 80.7 min; no complications; hospital discharge: POD 3 †                                         |
| Knezevic N. et al. (2022) [76] | Croatia     | Case series            | 10 mos (May 2019 - Mar 2020)  | 11 adrenal adenoma; 1 benign adrenal cyst                                                                        | 12                     | Transabdominal adrenalectomy (7 left; 5 right)            | Asensus Senhance®               | 2 (+ 1 AP for right side) | 1        | High-volume, extensive laparoscopic adrenalectomy experience                  | Well-trained and experienced assistants, all received specific training on the robotic system                        | OT: 165.1 min; DT: 11.6 min; CT: 98.6 min; conversion to laparoscopy: 8.3%; BL: 47 ml; Clavien-Dindo≥3: 8.3%; LOS: 4.5 days † |
| Park J. et al. (2022) [83]     | South Korea | Retrospective analysis | 7 month (Oct 2021 - Apr 2022) | 42 papillary thyroid carcinoma; 4 adenomas; 2 NIFTP; 1 follicular thyroid cancer; 1 poorly differentiated cancer | 50                     | Transaxillary hemithyroidectomy                           | Intuitive Surgical Da Vinci SP® | 3                         | 1        | Extensive experience in transaxillary robotic thyroidectomy (>500 procedures) | NS                                                                                                                   | OT: 57.8 min; DT: 2.4min; CT: 25.5 min; Clavien-Dindo≥3: 2%; LC for OT: 20 cases †                                            |
| Raffaelli M et al. (2022) [77] | Italy       | Case series            | Jul 2022                      | 3 Cushing's syndromes; 1 adrenal cystic lesion; 1 pheochromocytoma                                               | 5                      | Transabdominal adrenalectomy (3 left; 2 right)            | Medtronic Hugo™ RAS             | 2 (+ 1 AP)                | 1        | Experienced in both laparoscopic and robotic adrenalectomy                    | All participating surgeons and nurses completed the technical training delivered by the company at a training center | OT: 119 min; DT: 5 min; CT: 55 min; no Clavien-Dindo≥3; LOS: 2 days                                                           |
| Ho J. et al. (2023) [81]       | South Korea | Retrospective analysis | 19 mos (Jan 2020 - Jul 2021)  | papillary thyroid carcinoma                                                                                      | 30                     | Transaxillary hemithyroidectomy + lateral neck dissection | Intuitive Surgical Da Vinci SP® | 3 (+ 1 AP)                | 1        | NS                                                                            | NS                                                                                                                   | OT: 293.8 min; CT: 191.8 min; no Clavien-Dindo≥3; LOS: 4.8 days †                                                             |

| Comparative studies          |             |                        |                                |                                                                                                                          |                                         |                                                                                                                                      |                                                                                              |                  |         |    |    |                                                                                                                                                                 |
|------------------------------|-------------|------------------------|--------------------------------|--------------------------------------------------------------------------------------------------------------------------|-----------------------------------------|--------------------------------------------------------------------------------------------------------------------------------------|----------------------------------------------------------------------------------------------|------------------|---------|----|----|-----------------------------------------------------------------------------------------------------------------------------------------------------------------|
| Kim J.K. et al. (2022) [113] | South Korea | Retrospective analysis | 21 month (Jan 2019 - Sep 2021) | 190 papillary thyroid carcinoma; 10 benign nodules                                                                       | 200                                     | 36 conventional skin flap vs 164 two-step retraction technique (177 transaxillary hemithyroidectomy; 23 transaxillary thyroidectomy) | Intuitive Surgical Da Vinci SP®                                                              | 3 (+ 1 AP)       | 2       | NS | NS | Conventional skin flap OT: 115.3 min; DT: 5.2 min; CT: 48 min; no Clavien-Dindo≥3. Two-step method OT: 116.7 min; DT: 3.8 min; CT: 60 min; no Clavien-Dindo≥3 † |
| Lee I.A. et al (2022) [112]  | South Korea | Retrospective analysis | 17 mos (Feb 2020 - Jun 2021)   | 6 hyperaldosteronism; 1 adenoma; 1 incidentaloma vs 7 hyperaldosteronism; 2 pheochromocytoma, 1 Cushing; 1 incidentaloma | 19 (8 Da Vinci SP vs 11 Da Vinci Si/Xi) | 1 transabdominal adrenalectomy; 7 retroperitoneal adrenalectomy vs 11 retroperitoneal adrenalectomy                                  | Intuitive Surgical Da Vinci SP® Vs Intuitive Surgical Da Vinci Si/Xi with single-site system | 3 (+ 1 AP) vs NS | 1 vs NS | NS | NS | OT: 99.0 min vs 121.9 min; DT: 4.8 vs 7.7; conversion to laparoscopy: 0 vs 18.2%; BL: 2.5 ml vs 17.3 ml; no complications; LOS: 2.5 days vs 3.5 days †          |

All the reported values are absolute or median if not specified. † mean; NS: not specified; IO: intraoperative; PO: postoperative; LC: learning curve; OT: operative time; CT: console time; DT: docking time; CR: conversion rate; BLO: blood loss; LOS: length of stay; AP: assistant port; ST: short-term; LT long-term; NIFTP: non-invasive follicular thyroid neoplasm with papillary-like nuclear feature.
