# Supplementary material for: New Robotic Platforms in General Surgery: What’s the Current Clinical Scenario?
Source: MDPI journal article supplement (doi:10.3390/medicina59071264), 2023-07-07
Supplement: s1 [file s1]

Table S2. Hepatopancreatobiliary surgery

| References                         | Country     | Study design                              | Time period                 | Surgical indication                                                                                         | No. of pts/ procedures | Type of intervention                                                       | Robotic platform                | No. of operative | Surgeons involved | Surgeon previous experience                           | Surgical Team training                                                                      | Main results                                                                                                                  |
|------------------------------------|-------------|-------------------------------------------|-----------------------------|-------------------------------------------------------------------------------------------------------------|------------------------|----------------------------------------------------------------------------|---------------------------------|------------------|-------------------|-------------------------------------------------------|---------------------------------------------------------------------------------------------|-------------------------------------------------------------------------------------------------------------------------------|
| <i>Case report/Technical notes</i> |             |                                           |                             |                                                                                                             |                        |                                                                            |                                 |                  |                   |                                                       |                                                                                             |                                                                                                                               |
| Cruz J.C. et al. (2019) [13]       | South Korea | Case report                               | 2019                        | Cholelithiasis                                                                                              | 1                      | cholecystectomy                                                            | Intuitive Surgical Da Vinci SP® | 3                | 1                 | NS                                                    | NS                                                                                          | OT: 89 min; DT: 6 min; no IO complications, no PO complications                                                               |
| Kang I. et al. (2020) [38]         | South Korea | Case report                               | Dec 2018                    | Pancreatic insulinoma                                                                                       | 1                      | PD (laparoscopic resection and robotic reconstruction)                     | Meerecompany Revo-i™            | 2 (+ AP)         | NS                | NS                                                    | NS                                                                                          | OT (laparoscopic + robotic): 514 min; BL: 200 ml; no complications; LOS: 10 days                                              |
| Ku G. et al. (2020) [39]           | South Korea | Case report                               | Dec 2019                    | Pancreatic NET                                                                                              | 1                      | Central pancreatectomy (laparoscopic resection and robotic reconstruction) | Meerecompany Revo-i™            | 3 (+ AP)         | 2                 | NS                                                    | NS                                                                                          | OT: 295 min; BL: 50 ml; R0 resection; biochemical pancreatic fistula; LOS: 9 days                                             |
| Kim W.-J. et al. (2021) [37]       | South Korea | Case report                               | 2020                        | Intrahepatic lithiasis                                                                                      | 1                      | Left lateral sectionectomy                                                 | Intuitive Surgical Da Vinci SP® | 3 (+1 AP)        | NS                | NS                                                    | NS                                                                                          | OT: 135 min; DT: 8 min; BL: 50 ml; no complications; LOS: 5 days †                                                            |
| <i>Non-comparative studies</i>     |             |                                           |                             |                                                                                                             |                        |                                                                            |                                 |                  |                   |                                                       |                                                                                             |                                                                                                                               |
| Melling N. et al. (2019) [54]      | Germany     | Retrospective analysis                    | 4 mos (May 2017 - Aug 2017) | 15 cholelithiasis; 3 chronic cholecystitis; 1 chronic cholecystitis and pancreatitis; 1 acute cholecystitis | 20                     | Cholecystectomy                                                            | Asensus Senhance®               | 2 (+ 1 AP)       | 1                 | Previous laparoscopic and robotic Da Vinci experience | Surgeons and scrub nurse had 3 days of training course with simulation and pig lab activity | OT: 71.5 min; DT: 10 min; 1 conversion to laparoscopy: 5%; no complications; LC for DT after 10 cases                         |
| Aggarwal R. et al. (2020) [50]     | UK          | Retrospective analysis of a prospectively | NS                          | Cholelithiasis; cholecystitis; gallbladder polyp                                                            | 20                     | Cholecystectomy                                                            | Asensus Senhance®               | 2 (3 robotic + 1 | 1                 | Over 1000 laparoscopic cholecystectomy                | NS                                                                                          | OT: 86.5 (60.5-106.5); DT: 11.5 (9-13); IO complications: 2 (1 robot malfunction); no 30-days Clavien-Dindo≥3 complications † |

|                              |             |                                                              |                              |                                                                                        |     |                                                                                |                                 |                                |   |                                                                                  |                                                                                                                |                                                                                                                                                                                                |
|------------------------------|-------------|--------------------------------------------------------------|------------------------------|----------------------------------------------------------------------------------------|-----|--------------------------------------------------------------------------------|---------------------------------|--------------------------------|---|----------------------------------------------------------------------------------|----------------------------------------------------------------------------------------------------------------|------------------------------------------------------------------------------------------------------------------------------------------------------------------------------------------------|
|                              |             | collected database                                           |                              |                                                                                        |     |                                                                                |                                 | assistant )                    |   | s with only one conversion                                                       |                                                                                                                |                                                                                                                                                                                                |
| Lim J.H. et al. (2020) [53]  | South Korea | Retrospective analysis                                       | 5 mos (Aug 2016 - Dec 2016)  | 9 chronic cholecystitis; 4 gallbladder polyps; 2 gallbladder polyps and cholelithiasis | 15  | Cholecystectomy                                                                | Meerecompany Revo-i™            | 3                              | 1 | >2000 laparoscopic cholecystectomies and >400 robotic Da Vinci cholecystectomies | 12 hour specific Revo-i™ training was provided for the medical team                                            | OT: 115.3 min; DT: 10.6 min; CT: 49.7 min; BL: 3.33 ml; no IO complications; no 30-days Clavien–Dindo ≥III; LOS: 2 days; 93.3% of patients would undergo another operation involving Revo-i™ † |
| Choi Y.J. et al (2022) [78]  | South Korea | Case series                                                  | 8 mos (Jun 2020 - Dec 2020)  | 1 pancreatic serous cystadenoma; 1 pancreatic NET; 1 pancreatic cancer                 | 3   | distal splenopancreatectomy                                                    | Intuitive Surgical Da Vinci SP® | 3 (+1 AP)                      | 1 | NS                                                                               | NS                                                                                                             | OT: 215 min; DT 4.3 min; CT: 180.3 min; BL<500 ml; no complications; hospital discharge: POD 10.3 †                                                                                            |
| Liu R. et al. (2022) [79]    | China       | Retrospective analysis of a prospectively collected database | 3 mos (Dec 2021 - Feb 2022)  | resectable benign or borderline malignant pancreatic tumor                             | 23  | 11 distal pancreatectomy; 11 pancreatic enucleation; 1 pancreaticoduodenectomy | Intuitive Surgical Da Vinci SP® | 3 ( + 1/2 AP)                  | 1 | >1500 robotic Da Vinci pancreatic surgeries                                      | NS                                                                                                             | OT: 156.5 min; DT: 4.2 min; BL: 40 ml; no conversion; clinically relevant-PO pancreatic fistula: 13%; no Clavien-Dindo≥3; hospital discharge: POD 4; no 30-days readmission †                  |
| Khanna S. et al. (2022) [52] | India       | Retrospective analysis of a prospectively collected database | 18 mos (Feb 2020 - Aug 2021) | cholelithiasis; chronic and acute cholecystitis                                        | 106 | Cholecystectomy; subtotal cholecystectomy; cholecystostomy                     | CMR Versius®                    | 2 (3 BSU + 1 assistant trocar) | 1 | Over 40 years of biliary surgery experience                                      | structured robotic training with virtual training, dry lab, wet lab and cadaver training in various procedures | CR 1.88% (1 conversion to laparoscopy; 1 conversion to open); no serious complications; overall CT: 54.16 min (6–205); overall setting up time: 9.29 min †                                     |
| Sasaki T. et al. (2022) [55] | Japan       | Retrospective analysis                                       | 19 mos (Sep 2020 - Mar 2022) | 25 cholelithiasis; 5 chronic cholecystitis                                             | 30  | Cholecystectomy                                                                | Asensus Senhance®               | 2 (+ 1 AP)                     | 1 | Certificated by the Japanese ESSQS of the JSES training program for SDLS         | NS                                                                                                             | OT: 69 min; DT: 4 min; CT: 34 min; BL: 1 ml; conversion to laparoscopy: 10%; no Clavien–Dindo ≥III; LOS: 3 days                                                                                |

|                                        |             |                        |                              |                                                                                                                 |                                          |                 |                                                                                           |                        |            |                                                                                         |                                                                                                                     |                                                                                                                                                                                                                                             |
|----------------------------------------|-------------|------------------------|------------------------------|-----------------------------------------------------------------------------------------------------------------|------------------------------------------|-----------------|-------------------------------------------------------------------------------------------|------------------------|------------|-----------------------------------------------------------------------------------------|---------------------------------------------------------------------------------------------------------------------|---------------------------------------------------------------------------------------------------------------------------------------------------------------------------------------------------------------------------------------------|
| Kelkar D.S. et al. (2023) [51]         | India       | Prospective            | 19 mos (Mar 2019 - Jul 2020) | 114 symptomatic cholelithiasis; 26 cholecystitis; 3 polyps                                                      | 143                                      | Cholecystectomy | CMR Versius®                                                                              | 2 (+ 1 AP)             | 5          | Accredited, practicing, high-volume, extensive experience in MIS. No device experience. | All surgical team members completed a didactic online program, a simulated practice and a 3.5 days training program | OT: 92 min; BL: 21.7% patients <5 ml; ,conversion to laparoscopic surgery 7/143 (4.8%), conversion to open: 1.4% (7 device related coneresions); Clavien–Dindo ≥III: 2.1%; mortality: 0.7%; LOS: 2 days; 30-days hospital readmission: 2.8% |
| <i>Comparative studies - platforms</i> |             |                        |                              |                                                                                                                 |                                          |                 |                                                                                           |                        |            |                                                                                         |                                                                                                                     |                                                                                                                                                                                                                                             |
| Kang Y.H. et al. (2021) [100]          | South Korea | Retrospective analysis | 21 mos (Feb 2019 - Nov 2020) | cholelithiasis; polyps; adenomyomatosis; acute cholecystitis                                                    | 330 (72 Da Vinci SP vs 258 Da Vinci Xi)  | Cholecystectomy | Intuitive Surgical Da Vinci SP Vs Intuitive Surgical Da Vinci Xi with single-site system  | 3 vs 2 (+1 AP)         | 1          | NS                                                                                      | NS                                                                                                                  | OT 45.9 min vs 43.4 min; CT 20.3 min vs 23.1 min (p = 0.018); BL: 19.2 ml vs 14.3 ml (p=0.031); complications: 0 vs 2; LOS: 2.3 days vs 1.1 days; readmissions: 0 vs 4 †                                                                    |
| Samalavicius N.E. et al. (2021) [102]  | Lithuania   | Retrospective analysis | 12 mos                       | cholelithiasis                                                                                                  | 40 (20 Senhance; 20 laparoscopic)        | Cholecystectomy | Asensus Senhance® vs laparoscopy                                                          | NS                     | 2          | experienced surgeons                                                                    | NS                                                                                                                  | OT 88.5 vs 60.8 min (p<0.05); DT 12 min; BL: 14.6 ml vs 11.3 ml; no conversion; Clavien–Dindo ≥III: 5% vs 0; LOS 1.5 days vs 1.55 days                                                                                                      |
| Kim W-J. et al. (2022) [101]           | South Korea | Retrospective analysis | 50 mos (Mar 2017 - May 2021) | SP: 85 cholelithiasis; 24 polyp; 31 both; 5 adenomyoma. Xi: 92 cholelithiasis; 25 polyps; 40 both; 2 adenomyoma | 304 (145 Da Vinci SP vs 159 Da Vinci Xi) | Cholecystectomy | Intuitive Surgical Da Vinci SP® Vs Intuitive Surgical Da Vinci Xi with single-site system | 3 vs 2 (+1 AP)         | 1          | NS                                                                                      | NS                                                                                                                  | OT: 45.7 min vs 49.8 min; DT: 5.7 min vs 8.8min (p=0.024); no conversion; Clavien–Dindo ≥III: 0.7% vs 0.6%; LOS 2.1 days vs 2.1 days                                                                                                        |
| Wang G. et al. (2022) [103]            | China       | Multi-centre RCT       | 11 mos (Oct 2019 -           | MicroHand: 82 chronic                                                                                           | 168 (84 Micro Hand                       | Cholecystectomy | Wego MicroHand S vs Intuitive                                                             | 2 (+1 AP) vs 2 (+1 AP) | 2 / center | >5 years of endoscopic surgery, >1 year                                                 | NS                                                                                                                  | OT: 61 min vs 64 min; DT 12.0 min vs 16.4 (p=0.025); CT: 49.3 vs 48.6; BL 4.37 ml; 7.39 ml; gallbladder breach 4.8% vs 15.7% (p=0.021); no                                                                                                  |

|  |  |  |           |                                                                       |                    |  |                      |  |  |                                                                        |  |                                                           |
|--|--|--|-----------|-----------------------------------------------------------------------|--------------------|--|----------------------|--|--|------------------------------------------------------------------------|--|-----------------------------------------------------------|
|  |  |  | Sep 2020) | cholecystitis; 2 polyps. Da Vinci: 78 chronic cholecystitis; 6 polyps | vs 84 Da Vinci Si) |  | Surgical Da Vinci Si |  |  | of robotic surgery, both the surgeons passed the test product training |  | Clavien–Dindo ≥III in both groups; LOS 7 days vs 7 days † |
|--|--|--|-----------|-----------------------------------------------------------------------|--------------------|--|----------------------|--|--|------------------------------------------------------------------------|--|-----------------------------------------------------------|

All the reported values are absolute or median if not specified. † mean; NS: not specified; AP: assistant port; OT: operative time; DT: docking time; IO: intraoperative; PO: postoperative; LOS: length of stay; CT: console time; CR: conversion rate; BL: blood loss; NET: neuroendocrine tumor; PD: pancreaticoduodenectomy; LC: learning curve; MIS: minimally-invasive surgery; AP: assistant port.
