# Supplementary material for: New Robotic Platforms in General Surgery: What’s the Current Clinical Scenario?
Source: MDPI journal article supplement (doi:10.3390/medicina59071264), 2023-07-07
Supplement: s1 [file s1]

Table S1. Mixed series

| References                              | Country              | Study design | Time period                   | Surgical indication                                                                                                                                                               | No. of pts/ procedures | Type of intervention                                                                                                       | Robotic platform  | No. of operative arms | Surgeons involved | Surgeon experience                                                         | Surgical Team training                                                                               | Main results                                                                                                                                                                                                                                                             |
|-----------------------------------------|----------------------|--------------|-------------------------------|-----------------------------------------------------------------------------------------------------------------------------------------------------------------------------------|------------------------|----------------------------------------------------------------------------------------------------------------------------|-------------------|-----------------------|-------------------|----------------------------------------------------------------------------|------------------------------------------------------------------------------------------------------|--------------------------------------------------------------------------------------------------------------------------------------------------------------------------------------------------------------------------------------------------------------------------|
| <i>Case report/Technical notes</i>      |                      |              |                               |                                                                                                                                                                                   |                        |                                                                                                                            |                   |                       |                   |                                                                            |                                                                                                      |                                                                                                                                                                                                                                                                          |
| Halabi H et al. (2022) [46]             | United Arab Emirates | Case report  | NS                            | Meckel diverticulum                                                                                                                                                               | 1                      | Small bowel resection                                                                                                      | CMR Versius®      | 3                     | 2                 | NS                                                                         | NS                                                                                                   | Technical feasibility; no complications                                                                                                                                                                                                                                  |
| <i>Non-comparative studies</i>          |                      |              |                               |                                                                                                                                                                                   |                        |                                                                                                                            |                   |                       |                   |                                                                            |                                                                                                      |                                                                                                                                                                                                                                                                          |
| Yi B. et al. (2016) [98]                | China                | Case series  | mars 2014                     | 1 gastric perforation; 2 acute appendicitis                                                                                                                                       | 3                      | 1 gastric perforation repair; 2 appendectomies                                                                             | Wego MicroHand S  | 2 (+1 AP)             | NS                | NS                                                                         | NS                                                                                                   | OT: 143.3 min; DT: 26.7 min; BL 41.7 ml; LOS: 4.3 days †                                                                                                                                                                                                                 |
| Yi B. et al. (2017) [97]                | China                | Case series  | 13 mos (Apr 2014 - Apr 2015)  | 1 gastric perforation; 3 acute appendicitis; 5 acute cholecystitis; 1 ileocaecal tumor                                                                                            | 10                     | 1 gastric perforation repair; 3 appendectomies; 5 cholecystectomies; 1 RC                                                  | Wego MicroHand S  | 2 (+1 AP)             | 1                 | NS                                                                         | NS                                                                                                   | Gastric perforation: OT: 145 min; DT: 40 min; BL: 25 ml; LOS: 5 days. Appendectomy: OT: 120 min; DT: 25 min; BL: 30 ml; LOS: 1 day. Cholecystectomy: OT: 130 min; DT: 30 min; BL: 35 ml; LOS: 1 day. RC: 160 min; DT: 25 min; BL: 50 ml; LOS: 5 days. No complications † |
| deBeche-Adams W. et al. (2019) [88]     | US                   | Case series  | 3 mos (Apr 2018 - Jun 2018)   | 1 recurrent caecal adenoma; 1 caecal ulcer; 1 bilateral inguinal hernia; 1 incarcerated inguinal hernia; 1 gallstone pancreatitis; 1 chronic cholecystitis; 1 acute cholecystitis | 7                      | 3 cholecystectomies; 1 RC; 1 ileocaecal resection; 1 bilateral inguinal hernia repair; 1 right inguinal hernia repair      | Asensus Senhance® | 2 (± 1-2 AP)          | 3                 | Expert surgeons with years of experience in open, laparoscopy and robotics | Credentialing process: animal lab (at least 3 procedures/surgeon); proctoring during the first cases | RC and ileocecal resection LOS: 2 days. Cholecystectomies and hernia repairs LOS: 0 day (ambulatory) †                                                                                                                                                                   |
| Montlouis-Calixte J. et al. (2019) [92] | France               | Case series  | 6 mos (Jul 2017 - Dec 2017)   | 9 gynecological (6 adnexial pathologies, 2 endometriosis, 1 myoma); 5 cholelithiasis                                                                                              | 14                     | 9 gynecological (3 ovariectomies; 4 ovarian cystectomy; 1 myomectomy; 1 endometrial nodule resection); 5 cholecystectomies | Asensus Senhance® | 2 (+1 AP)             | 3                 | Experienced laparoscopic surgeons                                          | They received a specific training for the use of the Senhance® system                                | Cholecystectomy: OT: 87 min; conversion to laparoscopy: 7.1%; no complications †                                                                                                                                                                                         |
| Kelkar D. et al. (2020) [91]            | India                | Case series  | 1 month (Mar 2019 - Apr 2019) | 9 cholelithiasis; 4 appendicitis; 17 gynecological diseases or infertility                                                                                                        | 30                     | 9 cholecystectomies; 4 appendectomies; 17 gynecological procedures                                                         | CMR Versius®      | 2 (+1 AP)             | 6                 | High-volume, accredited surgeons                                           | All members completed the validated 3.5-day Versius® training                                        | OT: 120 min; no conversion; BL < 5 mL: 63.3%; BL < 500 mL: 36.7%; no Clavien–Dindo ≥III; 90-days readmission rate: 6.7%; LOS: 3 days                                                                                                                                     |
| Samalavicius N.E. et al. (2020) [93]    | Lithuania            | Case series  | 5 mos (Nov 2018 - Mar 2019)   | 39 abdominal; 31 urologic; 30 gynecological                                                                                                                                       | 100                    | 16 cholecystectomies; 15 colorectal resections; 8 TAPP; 31 urological procedures; 30 gynecological procedures              | Asensus Senhance® | NS                    | 2                 | NS                                                                         | Surgeons, scrub nurses and anesthesiologists had a 2 day dry lab training and a 1 day wet lab        | OT: 145 min; CR: 3%; Clavien–Dindo ≥III: 3%; no mortality                                                                                                                                                                                                                |

|                               |         |                                                              |                               |                                                                                                                                                                                                                                          |     |                                                                                                                                                                                                                                                                                                                                           |                                 |            |    |                                                                                        |                                                                                          |                                                                                                                                                                                                                                                                                                                                                         |
|-------------------------------|---------|--------------------------------------------------------------|-------------------------------|------------------------------------------------------------------------------------------------------------------------------------------------------------------------------------------------------------------------------------------|-----|-------------------------------------------------------------------------------------------------------------------------------------------------------------------------------------------------------------------------------------------------------------------------------------------------------------------------------------------|---------------------------------|------------|----|----------------------------------------------------------------------------------------|------------------------------------------------------------------------------------------|---------------------------------------------------------------------------------------------------------------------------------------------------------------------------------------------------------------------------------------------------------------------------------------------------------------------------------------------------------|
|                               |         |                                                              |                               |                                                                                                                                                                                                                                          |     |                                                                                                                                                                                                                                                                                                                                           |                                 |            |    |                                                                                        | on pigs, under proctor's guidance                                                        |                                                                                                                                                                                                                                                                                                                                                         |
| Yao Y. et al. (2020) [96]     | China   | Case series                                                  | 57 mos (mars 2014 - Jan 2019) | sigmoid carcinoma; colon cancer; gastric cancer; rectal cancer; cholelithiasis; GIST; appendicitis; metabolic syndrome; choledochocyst; liver cancer; duodenal cancer; gastric ulcer; diverticulum of small intestine; pancreatic cancer | 81  | 19 sigmoidectomies; 16 gastrectomies; 12 RC; 11 anterior resections; 5 left colectomies; 4 cholecystectomies; 3 gastric GIST resections; 3 appendectomies; 2 sleeve gastrectomies; 1 left lateral liver lobectomy; 1 choledochal cyst resection; 1 gastrojejunostomy; 1 partial gastrectomy; 1 diverticulectomy; 1 partial pancreatectomy | Wego MicroHand S                | 2 (+ 2 AP) | 1  | ≥ 1 year of robotic surgery experience                                                 | NS                                                                                       | OT: 100–495 min; DT 7–54 min; BL: 20–1200 ml; LOS 4–30 days; CR: 3.7%; IO complications: 2.5%; no Clavien–Dindo ≥III; no readmission; no mortality †                                                                                                                                                                                                    |
| Dixon F. et al. (2021) [89]   | UK      | Retrospective analysis of a prospectively collected database | 19 mos (Nov 2019 - May 2021)  | 68 colorectal (54 malignant, 14 benign), 60 gynecologic (23 malignant, 37 benign), 32 general surgery (32 benign)                                                                                                                        | 160 | 68 colorectal (22 RC; 25 anterior resections; 10 APR; 4 left colectomies; 7 others); 68 gynecologic unspecified procedures; 32 general surgeries (18 inguinal hernias; 6 cholecystectomies; 8 ventral hernias)                                                                                                                            | CMR Versius®                    | NS         | 8  | Consultants with experience in laparoscopy. Only one had experience in robotic surgery | NS                                                                                       | Colorectal: OT 170 min; conversion to open: 4.4%; Clavien–Dindo ≥III: 7.3%; LOS: 6 days; (3–34); readmission: 8.8%. General Surgery: OT 66 min; no conversion; LOS: 0 days; no Clavien–Dindo ≥III †                                                                                                                                                     |
| Stephan D. et al. (2021) [94] | Germany | Case series                                                  | 41 mos (Feb 2017 - Jul 2020)  | NS                                                                                                                                                                                                                                       | 871 | 220 unilateral hernia repairs; 70 bilateral hernia repairs; 159 cholecystectomies; 168 prostatectomies; 62 total hysterectomies; 192 others (visceral, colorectal, and gynecological)                                                                                                                                                     | Asensus Senhance®               | NS         | NS | Experienced laparoscopic surgeons                                                      | NS                                                                                       | DT: 7.5 min; OT: 114.3 min; conversion to laparoscopy: 3.7%; conversion to open: 1.6%; severe complications: 2.8% (20.8% related to the robot); no mortality                                                                                                                                                                                            |
| Bianco F. et al. (2022) [87]  | US      | Retrospective analysis of a prospectively collected database | 26 mos (Jul 2019 - Sep 2021)  | 70 unilateral inguinal hernias; 7 bilateral inguinal hernias; 138 cholelithiasis or cholecystitis and cholelithiasis; 3 gallbladder polyps                                                                                               | 217 | 77 TAPP; 141 cholecystectomy                                                                                                                                                                                                                                                                                                              | Intuitive Surgical Da Vinci SP® | 3          | 1  | Robotic multiport and Da Vinci single site surgery experience                          | Training using simulation, 2 days of dry and wet lab, case observation, internal Urology | TAPP: OT 79.1 min; no conversions, hospital discharge: POD 0; no IO complications; no Clavien–Dindo ≥III; readmissions rate: 1.3%; port site incisional hernia: 1.3%. Cholecystectomy: OT 65.5 min; no conversions, hospital discharge: POD 0; no IO complications; no Clavien–Dindo ≥III; readmissions rate: 1.4%; port site incisional hernia: 1.4% † |

|                                 |                      |                                                              |                              |                                                                                                                                  |     |                                                                                                                                                                                                                                                                                    |              |            |   |                                       |                                                                                                                                                                        |                                                                                                                                                                                                                                    |
|---------------------------------|----------------------|--------------------------------------------------------------|------------------------------|----------------------------------------------------------------------------------------------------------------------------------|-----|------------------------------------------------------------------------------------------------------------------------------------------------------------------------------------------------------------------------------------------------------------------------------------|--------------|------------|---|---------------------------------------|------------------------------------------------------------------------------------------------------------------------------------------------------------------------|------------------------------------------------------------------------------------------------------------------------------------------------------------------------------------------------------------------------------------|
|                                 |                      |                                                              |                              |                                                                                                                                  |     |                                                                                                                                                                                                                                                                                    |              |            |   |                                       | proctor for first cases                                                                                                                                                |                                                                                                                                                                                                                                    |
| Wehrmann S. et al. (2022) [95]  | Germany              | Retrospective analysis of a prospectively collected database | 11 mos (Apr 2021 - Mar 2022) | NS                                                                                                                               | 175 | 130 cholecystectomies; 27 colorectal (13 LARs; 11 RC; 3 appendectomies); 12 Upper GI (5 esophagectomies; 3 gastrectomies; 1 Heller myotomy; 1 fundoplication; 1 cardiomyotomy; 1 pyloroplasty); 5 HPB (2 liver cystectomy; 2 pancreatectomy; 1 left pancreatectomy); 1 splenectomy | CMR Versius® | 3          | 2 | NS                                    | All the surgical team performed: online training, simulation, 3.5 day training programme with cadaveric model and animal model. The first cases were cholecystectomies | Cholecystectomy: OT: 82 min; BL: 10 ml; Clavien-Dindo ≥III: 0.8%; LOS: 3 days. Other procedures: OT range: 72-416; BL range: 0-800 ml; Clavien-Dindo ≥III: 8.9%; LOS range: 5-24 days †                                            |
| El Dahdah J. et al. (2022) [90] | United Arab Emirates | Case series                                                  | 3 mos (Oct 2021 - Dec 2021)  | bilateral inguinal hernias; unilateral inguinal hernias; umbilical hernias; ventral hernias; appendix and gallbladder affections | 55  | 30 hernia repairs; 22 cholecystectomies; 3 appendectomies                                                                                                                                                                                                                          | CMR Versius® | 2 (± 1 AP) | 3 | >200/surgeon robotic Da Vinci surgery | Online course, 6h virtual training, 3 day dry lab                                                                                                                      | Bilateral inguinal hernia OT: 95.2 min; unilateral Inguinal hernia OT: 50.9 min; umbilical hernia: 71.3 min; ventral hernia: 115.5 min; cholecystectomy OT: 35.8 min; appendectomy OT: 28.3 min; no conversion; no complications † |

All the reported values are absolute or median if not specified. † mean; NS: not specified; IO: intraoperative; PO: postoperative; LC: learning curve; OT: operative time; CT: console time; DT: docking time; CR: conversion rate; BL: blood loss; LOS: length of stay; AP: assistant port; RC: right colectomy
