# Supplementary material for: New Robotic Platforms in General Surgery: What’s the Current Clinical Scenario?
Source: MDPI journal article supplement (doi:10.3390/medicina59071264), 2023-07-07
Supplement: s1 [file s1]

Table S7. Breast surgery

| References                         | Country     | Study design           | Time period        | Surgical indication | No. of pts/ procedures      | Type of intervention                                                                                                                                                                                 | Robotic platform                | No. of operative | Surgeons involved | Surgeon previous experience | Surgical Team training                        | Main results                                                                                                                                                                                                                           |
|------------------------------------|-------------|------------------------|--------------------|---------------------|-----------------------------|------------------------------------------------------------------------------------------------------------------------------------------------------------------------------------------------------|---------------------------------|------------------|-------------------|-----------------------------|-----------------------------------------------|----------------------------------------------------------------------------------------------------------------------------------------------------------------------------------------------------------------------------------------|
| <i>Case report/Technical notes</i> |             |                        |                    |                     |                             |                                                                                                                                                                                                      |                                 |                  |                   |                             |                                               |                                                                                                                                                                                                                                        |
| Park H.S. et al. (2020) [40]       | South Korea | Case report            | 2019               | breast cancer       | 1                           | bilateral nipple-sparing mastectomy with one-stage reconstruction                                                                                                                                    | Intuitive Surgical Da Vinci SP® | 3                | 2                 | NS                          | Surgeons practiced on 6 breasts of 3 cadavers | OT: 170 min (left) and 180 min (right); DT: 5 min; CT: 93 min (left) and 109 min (right); total OT including reconstruction: 619 min; no Clavien-Dindo≥3; hospital discharge: POD 15; drain ablation: POD 26 (left) and POD 24 (right) |
| Joo O.Y. et al. (2020) [41]        | South Korea | Case report            | 2020               | breast cancer       | 2                           | 1 nipple-sparing mastectomy with one-stage reconstruction (and acellular dermal matrix adoption); 1 nipple-sparing mastectomy with tissue expander                                                   | Intuitive Surgical Da Vinci SP® | 3                | 1                 | NS                          | NS                                            | OT (one-stage): 6 hours; OT (two-stage): 2 hours; no Clavien-Dindo≥3                                                                                                                                                                   |
| <i>Non-comparative studies</i>     |             |                        |                    |                     |                             |                                                                                                                                                                                                      |                                 |                  |                   |                             |                                               |                                                                                                                                                                                                                                        |
| Go J. et al. (2022) [80]           | South Korea | Retrospective analysis | 36 mos (2018-2021) | breast cancer       | 70 patients (81 procedures) | 53 nipple-sparing mastectomy with one-stage reconstruction; 16 nipple-sparing mastectomy with DIEP flap; 11 nipple-sparing mastectomy with tissue expander; 1 nipple-sparing mastectomy with LD flap | Intuitive Surgical Da Vinci SP® | 3                | NS                | NS                          | NS                                            | OT: 259 min (unilateral), 407 min (bilateral); CT: 48 min (unilateral), 110 min (bilateral); incision length: 45 mm; Clavien-Dindo≥3: 7.4%; drain ablation: 13 days                                                                    |

All the reported values are absolute or median if not specified. NS: not specified; IO: intraoperative; PO: postoperative; OT: operative time; CT: console time; DT: docking time; LOS: length of stay.
