# Supplementary material for: New Robotic Platforms in General Surgery: What’s the Current Clinical Scenario?
Source: MDPI journal article supplement (doi:10.3390/medicina59071264), 2023-07-07
Supplement: s1 [file s1]

Table S4. Abdominal wall surgery

| References                           | Country                         | Study design           | Time period                  | Surgical indication          | No. of pts/ procedures                             | Type of intervention                                         | Robotic platform                | No. of operative cases | Surgeons involved | Surgeon previous experience                                               | Surgical Team training                                                                     | Main results                                                                                                                                                                                                                         |
|--------------------------------------|---------------------------------|------------------------|------------------------------|------------------------------|----------------------------------------------------|--------------------------------------------------------------|---------------------------------|------------------------|-------------------|---------------------------------------------------------------------------|--------------------------------------------------------------------------------------------|--------------------------------------------------------------------------------------------------------------------------------------------------------------------------------------------------------------------------------------|
| Case report/Technical notes          |                                 |                        |                              |                              |                                                    |                                                              |                                 |                        |                   |                                                                           |                                                                                            |                                                                                                                                                                                                                                      |
| Kim C.H. et al. (2022) [11]          | South Korea                     | Technical note         | 2022                         | umbilical hernia             | 1                                                  | eTEP ventral hernia repair                                   | Intuitive Surgical Da Vinci SP® | 2                      | 1                 | NS                                                                        | NS                                                                                         | Technical feasibility                                                                                                                                                                                                                |
| Kim D. et al. (2022) [12]            | South Korea                     | Technical note         | 2022                         | incarcerated inguinal hernia | 1                                                  | unilateral SP-TEP                                            | Intuitive Surgical DaVinci SP®  | 2                      | 1                 | NS                                                                        | NS                                                                                         | Technical feasibility                                                                                                                                                                                                                |
| Non-comparative studies              |                                 |                        |                              |                              |                                                    |                                                              |                                 |                        |                   |                                                                           |                                                                                            |                                                                                                                                                                                                                                      |
| Schmitz R. et al. (2019) [49]        | Germany                         | Retrospective analysis | 7 mos (Mar 2017 - Sep 2017)  | inguinal hernias             | 64 (52 unilateral; 12 bilateral)                   | unilateral and bilateral MP-TAPP                             | Asensus Senhance®               | 2                      | 3                 | Experience with TAPP                                                      | Simulation, observation of live cases and animal lab                                       | OT: 48 min; DT: 7 min; conversion to laparoscopy: 3.1% (1 robot malfunction); no complications; LOS: 1 day; no LC detected                                                                                                           |
| Dixon F. et al. (2022) [47]          | UK                              | Case series            | 12 mos (NS)                  | inguinal and ventral hernias | 41 (28 unilateral; 4 bilateral; 9 ventral hernias) | unilateral and bilateral MP-TAPP                             | CMR Versius®                    | 2                      | NS                | Extensive experience in MIS, but only one had previous robotic experience | Dual consultant operations. CMR surgical-validated training program (simulation, cadavers) | Inguinal hernia CT: 41 min (13-141); ventral hernia CT: 26 min (8-56); inguinal hernia DT: 8 (5-18) min; ventral hernia DT: 13 (5-25) min; Inguinal hernia CR: 9,4%; Ventral hernia CR: 11,1%; no Clavien-Dindo≥3; no PO readmission |
| Samalavicius N.E. et al. (2022) [48] | Lithuania<br>Germany<br>Belarus | Registry analysis      | 36 mos (Mar 2017 – Mar 2020) | inguinal and ventral hernias | 271 (203 unilateral; 68 bilateral)                 | unilateral and bilateral MP-TAPP; IPOM ventral hernia repair | Asensus Senhance®               | 2                      | NS                | Experienced surgeons                                                      | Training center. Proctor for the first surgeries                                           | OT for unilateral 74 ± 35 (32–265) and OT for bilateral 104 ± 36 (60–220); DT: 7±3 (1–90); CR: 4.4% (8 conversion to laparoscopy; 4 conversion to open); 5 IO complications (3 robot malfunction); Clavien-Dindo IIIb rate: 1.85% +  |
| Comparative studies - platforms      |                                 |                        |                              |                              |                                                    |                                                              |                                 |                        |                   |                                                                           |                                                                                            |                                                                                                                                                                                                                                      |

|                                           |    |                                                                                      |                                                 |                     |                                                                                                                         |                                                                                       |                                                                          |                         |   |                                                                                                           |                                                                                                                                                                       |                                                                                                                                                                                                                                                                                                                                                                                                                                                                                          |
|-------------------------------------------|----|--------------------------------------------------------------------------------------|-------------------------------------------------|---------------------|-------------------------------------------------------------------------------------------------------------------------|---------------------------------------------------------------------------------------|--------------------------------------------------------------------------|-------------------------|---|-----------------------------------------------------------------------------------------------------------|-----------------------------------------------------------------------------------------------------------------------------------------------------------------------|------------------------------------------------------------------------------------------------------------------------------------------------------------------------------------------------------------------------------------------------------------------------------------------------------------------------------------------------------------------------------------------------------------------------------------------------------------------------------------------|
| Dreifuss<br>N.H.<br>et al.<br>(2022) [99] | US | Retrospective<br>comparative<br>study of a<br>prospectively<br>collected<br>database | 116<br>mos<br>(Jul<br>2012<br>-<br>Mar<br>2022) | inguinal<br>hernias | 465 (304<br>unilateral<br>MP-TAPP;<br>74 bilateral<br>MP-TAPP;<br>79 unilateral<br>SP-TAPP; 8<br>bilateral SP-<br>TAPP) | unilateral and<br>bilateral MP-<br>TAPP vs<br>unilateral and<br>bilateral SP-<br>TAPP | Intuitive Surgical<br>Da Vinci SP®;<br>Intuitive Surgical<br>Da Vinci Si | NS (MP)<br>vs<br>2 (SP) | 1 | 10-years<br>experience<br>in TAPP,<br>robotic<br>multiport,<br>and Da<br>Vinci<br>single-site<br>surgery. | Simulation,<br>dry/wet lab,<br>and case<br>observation.<br>Proctoring for<br>the first 3<br>cases. Nursing<br>staff, scrub<br>techs and<br>residents were<br>trained. | OT SP-TAPP: 78.1 (26-149) min; DT SP-TAPP: 2.2<br>(1-10) min; SP-TAPP OT < MP-TAPP in unilateral<br>hernias (p=0.003); no IO complications; no<br>conversion; same day discharge: SP-TAPP > MP-<br>TAPP (p=0.001). Recovery time: SP-TAPP < MP-<br>TAPP (p<0.001). LOS: SP-TAPP < MP-TAPP<br>(p<0.001); no serious PO complications; 30-day<br>mortality and readmission rate were similar.<br>Chronic pain, hernia recurrence, and port-site<br>incisional hernias rates were similar † |
|-------------------------------------------|----|--------------------------------------------------------------------------------------|-------------------------------------------------|---------------------|-------------------------------------------------------------------------------------------------------------------------|---------------------------------------------------------------------------------------|--------------------------------------------------------------------------|-------------------------|---|-----------------------------------------------------------------------------------------------------------|-----------------------------------------------------------------------------------------------------------------------------------------------------------------------|------------------------------------------------------------------------------------------------------------------------------------------------------------------------------------------------------------------------------------------------------------------------------------------------------------------------------------------------------------------------------------------------------------------------------------------------------------------------------------------|

All the reported values are absolute or median if not specified. † mean; NS: not specified; IO: intraoperative; PO: postoperative; LC: learning curve; OT: operative time; CT: console time; DT: docking time; CR: conversion rate; LOS: length of stay; TEP: totally extraperitoneal; TAPP: transabdominal pre-peritoneal; MP: multi-port; SP: single-port; IPOM: intraperitoneal onlay mesh; MIS: minimally-invasive surgery; AP: assistant port.
